# Supplementary material
Source: publisher site journal article supplement (https://www.e-cmh.org/upload/media/cmh-2023-0110-Supplementary-Table-5.pdf)
Supplement: Supplementary file 1 [file cmh-2023-0110-Supplementary-Table-5.pdf]

**Supplementary Table 5.** Liver-related annual mortality rate due to HBV by gender (per 100,000 persons)

| Sex    | Age group           | 2011  | 2012  | 2013  | 2014  | 2015  | 2016  | 2017  | 2018  | 2019  | 2020  |
|--------|---------------------|-------|-------|-------|-------|-------|-------|-------|-------|-------|-------|
| Male   | 0–9                 | 0.00  | 0.00  | 0.00  | 0.00  | 0.00  | 0.04  | 0.00  | 0.00  | 0.00  | 0.00  |
|        | 10–19               | 0.03  | 0.03  | 0.03  | 0.10  | 0.00  | 0.00  | 0.04  | 0.04  | 0.00  | 0.00  |
|        | 20–29               | 0.26  | 0.14  | 0.14  | 0.09  | 0.14  | 0.17  | 0.08  | 0.06  | 0.08  | 0.03  |
|        | 30–39               | 2.11  | 2.04  | 2.13  | 2.43  | 1.94  | 1.90  | 1.93  | 1.93  | 1.73  | 1.19  |
|        | 40–49               | 12.30 | 13.19 | 12.33 | 12.30 | 11.16 | 12.28 | 10.64 | 10.22 | 8.05  | 7.59  |
|        | 50–59               | 32.43 | 35.14 | 34.62 | 35.79 | 33.29 | 30.75 | 30.08 | 27.59 | 25.40 | 22.76 |
|        | 60–69               | 36.34 | 40.75 | 42.45 | 39.05 | 38.18 | 38.04 | 34.84 | 34.60 | 34.09 | 30.74 |
|        | 70–79               | 23.45 | 29.13 | 30.32 | 29.83 | 29.43 | 27.71 | 30.36 | 26.78 | 27.25 | 29.56 |
|        | 80+                 | 14.36 | 9.22  | 13.54 | 17.62 | 14.06 | 17.61 | 13.45 | 20.63 | 17.98 | 17.44 |
|        | Total               | 11.51 | 12.95 | 13.33 | 13.65 | 13.14 | 13.19 | 12.82 | 12.57 | 12.06 | 11.53 |
|        | Adjusted mortality* | 28.43 | 31.99 | 32.91 | 33.71 | 32.44 | 32.56 | 31.67 | 31.03 | 29.78 | 28.46 |
| Female | 0–9                 | 0.00  | 0.00  | 0.00  | 0.00  | 0.00  | 0.00  | 0.00  | 0.00  | 0.00  | 0.00  |
|        | 10–19               | 0.00  | 0.00  | 0.00  | 0.00  | 0.00  | 0.00  | 0.00  | 0.00  | 0.00  | 0.00  |
|        | 20–29               | 0.12  | 0.06  | 0.06  | 0.19  | 0.03  | 0.00  | 0.06  | 0.03  | 0.15  | 0.03  |
|        | 30–39               | 0.30  | 0.32  | 0.36  | 0.47  | 0.37  | 0.71  | 0.36  | 0.62  | 0.29  | 0.33  |
|        | 40–49               | 1.66  | 1.76  | 1.62  | 1.25  | 1.45  | 1.43  | 1.14  | 1.17  | 0.90  | 1.00  |
|        | 50–59               | 3.92  | 4.64  | 4.84  | 4.41  | 4.17  | 4.56  | 3.90  | 3.27  | 3.14  | 2.66  |
|        | 60–69               | 10.51 | 10.29 | 11.03 | 9.83  | 9.54  | 8.29  | 8.14  | 7.07  | 6.23  | 5.60  |
|        | 70–79               | 10.28 | 12.18 | 12.58 | 12.63 | 12.93 | 13.98 | 11.81 | 12.22 | 11.51 | 9.98  |
|        | 80+                 | 6.00  | 6.38  | 8.00  | 9.86  | 8.53  | 8.83  | 8.29  | 9.42  | 9.90  | 9.08  |
|        | Total               | 2.67  | 2.99  | 3.23  | 3.17  | 3.17  | 3.31  | 3.01  | 2.99  | 2.86  | 2.63  |
|        | Adjusted mortality* | 7.02  | 7.86  | 8.47  | 8.33  | 8.31  | 8.67  | 7.90  | 7.85  | 7.49  | 6.91  |

HBV, Hepatitis B virus.

\*Adjustment for linkage-to-care rate.
